# Supplementary material for: Sign reversal diode effect in superconducting Dayem nanobridges
Source: Springer Nature journal article supplement (doi:10.1038/s42005-023-01458-9), 2023-11-27
Supplement: 42005_2023_1458_MOESM2_ESM.pdf [file 42005_2023_1458_MOESM2_ESM.pdf]

# Sign reversal diode effect in superconducting Dayem nanobridges

Daniel Margineda,<sup>1,4,\*</sup> Alessandro Crippa,<sup>1</sup> Elia Strambini,<sup>1</sup> Yuri Fukaya,<sup>2</sup>  
Maria Teresa Mercaldo,<sup>3</sup> Mario Cuoco,<sup>2</sup> and Francesco Giazotto<sup>1,†</sup>

<sup>1</sup>*NEST Istituto Nanoscienze-CNR and Scuola Normale Superiore, I-56127, Pisa, Italy*

<sup>2</sup>*SPIN-CNR, I-84084 Fisciano (SA), Italy*

<sup>3</sup>*Dipartimento di Fisica “E. R. Caianiello”, Università di Salerno, I-84084 Fisciano (SA), Italy*

<sup>4</sup>*present address: CIC nanoGUNE BRTA, E-20018 Donostia-San Sebastian, Spain.*

---

\* d.margineda@nanogune.eu

† francesco.giazotto@sns.it

## Supplementary Information

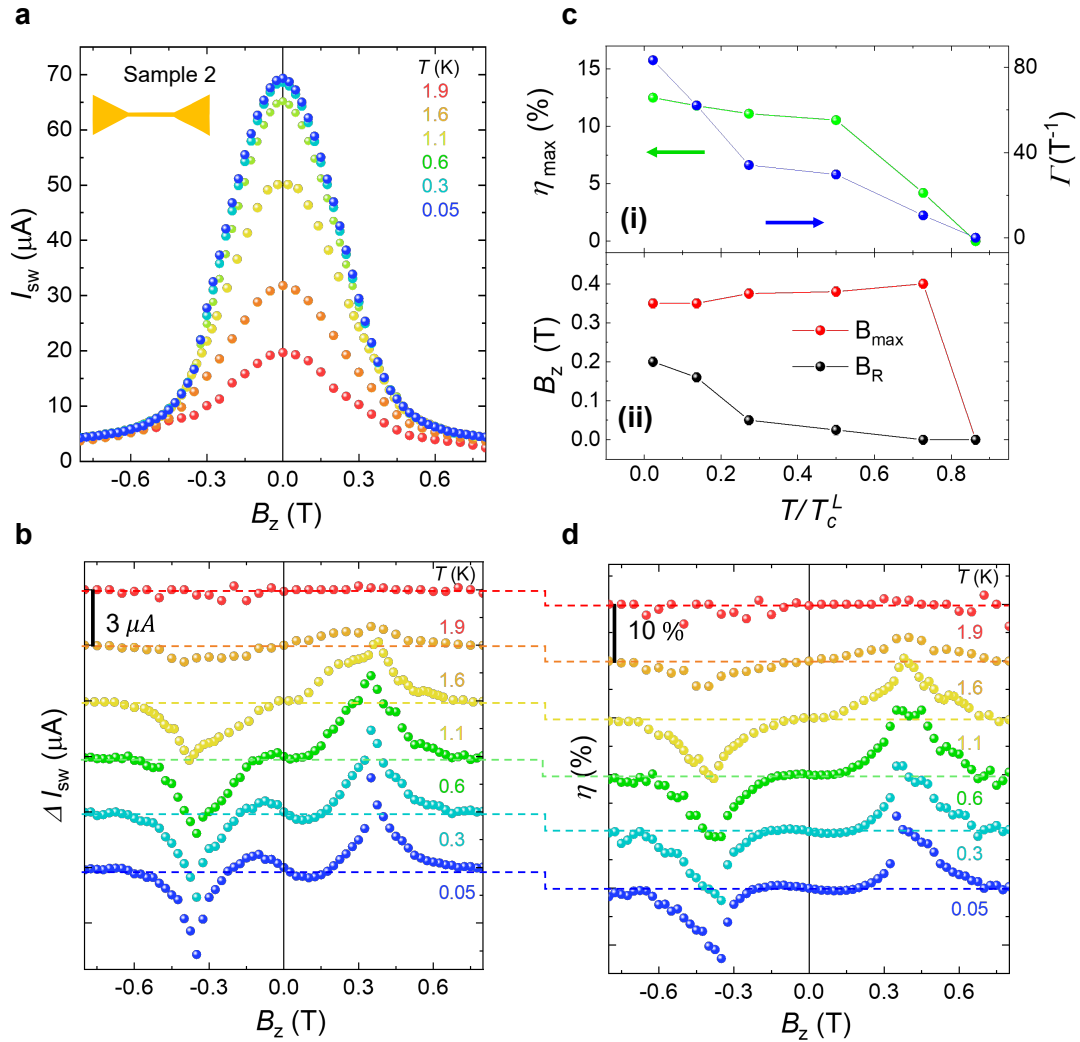

**Supplementary Figure 1. Diode effect in a second long Dayem bridge.** **a**, Magnetic field dependence of the switching current  $I_{sw}^+$  for positive bias current at selected temperatures. **b**,  $\Delta I_{sw}$ , for the given temperatures. Compared with the device results presented in the main manuscript, the sign reversal of the rectification occurs at lower fields and vanishes at lower temperatures  $T \simeq 0.6$  K, while the rectification peak at  $B_{max}$  remains unaffected by temperature up to to  $T \simeq 1.6$  K. **c**, Rectification parameters:  $\eta_{max} \equiv (\eta_{max}(B_z > 0) + \eta_{max}(B_z < 0))/2$  (green dots), field-to-rectification efficiency transfer function  $\Gamma$  (blue dots) **(i)**,  $B_{max}$  (red dots) and  $B_R$  (black dots) magnetic fields **(ii)** versus normalized temperature.  $T_c^L$  denotes the critical temperature of the long bridge.  $\eta_{max}$  is the rectification value of the low-field peak at  $B_{max}$ . **d**  $\eta(B_z)$  for selected bath temperatures marked by dashed lines in panel **b**. Curves are vertically offset for clarity.

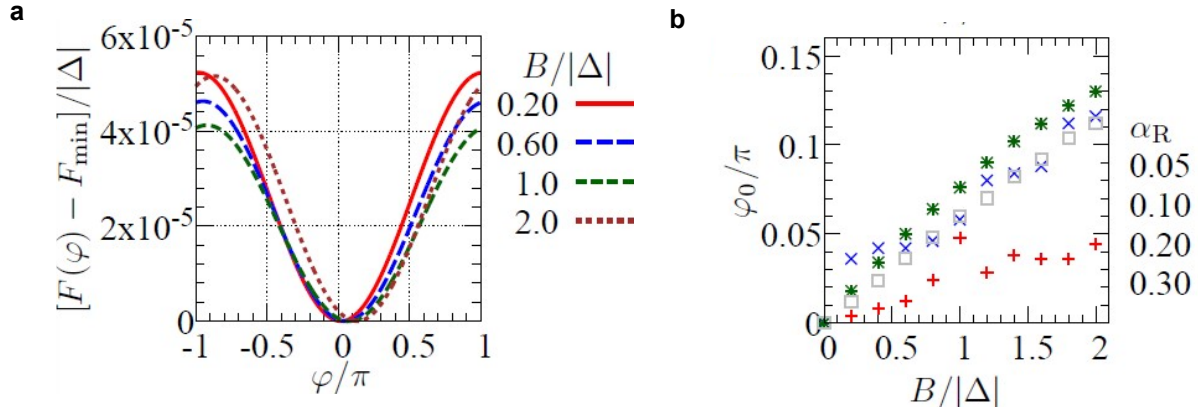

**Supplementary Figure 2. Free energy of a weak link in the presence of an out-of-plane magnetic field yielding an anomalous phase shift.** **a** Free energy  $F$  as a function of the phase difference  $\varphi$  for a  $SS'S$  weak link forming a slab with  $w < l$  for selected B-field values. We assume that both Rashba and Dresselhaus interactions are not negligible due to the mirror symmetry breaking at grain boundaries and slab interfaces. For the calculations, we choose a representative amplitude of the Rashba and Dresselhaus interactions ( $\alpha_R = \alpha_D = 0.2t$ ), where  $t$  is the hopping amplitude that sets the kinetic energy scale. The anomalous phase  $\varphi_0$  is given by the free energy minima. For clarity, we use  $F_{\min}$  as an offset value of the energy for each free energy evaluated. **b**, Anomalous phase  $\varphi_0$  as a function of the applied magnetic field  $B$  (in units of superconducting gap amplitude  $\Delta$ ) for different strengths of  $\alpha_R$  ( $= \alpha_D$ , in  $t$  units). The value of  $\varphi_0$  is extracted as in **a**. We set the chemical potential as  $\mu = 0.005t$ . The anomalous phase scales almost linearly with the magnetic field, reaching an amplitude of about  $0.1\pi$  when  $B \sim \Delta$ .
